# Supplementary material
Source: PubMed Central journal article supplement (PMC5935555)
Supplement: NIHMS958061-supplement.pdf [file NIHMS958061-supplement.pdf]

## **SUPPLEMENTAL INFORMATION**

### **SUPPLEMENTAL FIGURES**

**Figure S1. Related to Figure 1. Carm1 is a Substrate for p38 $\gamma$**

**Figure S2. Related to Figure 2. Carm1 is Phosphorylated on S572 by p38 $\gamma$**

**Figure S3. Related to Figure 3. Carm1 Isoform 2 is Functionally Regulated by p38 $\gamma$**

**Figure S4. Related to Figure 4. Validation of p38 $\gamma$  and p38 $\alpha$  siRNAs and**

**Supplementary Analyses**

**Figure S5. Related to Figure 5. Description and Validation of the *Pax7<sup>CreER/+</sup>·p38 $\gamma$ <sup>ff</sup>***

**Mouse Model**

**Figure S6. Related to Figure 6. p38 $\gamma$ /Carm1 Interacts with  $\beta$ 1-Syntrophin in Satellite**

**Cells**

**Figure S7. Related to Figures 6 and 7. p38 $\gamma$ -Mediated Carm1 Regulation is Perturbed**

**in *mdx* Satellite Cells**

### **SUPPLEMENTAL TABLES**

**Table S1. Related to Figure 2. Fragment Mass Match Table**

**Table S2. Related to Figure 2. All Matches Table**

**Table S3. Related to STAR Methods. siRNA Targeting Sequences**

**Table S4. Related to STAR Methods. Primers Used for ChIP, RT-qPCR, and ddPCR**

**Analysis**

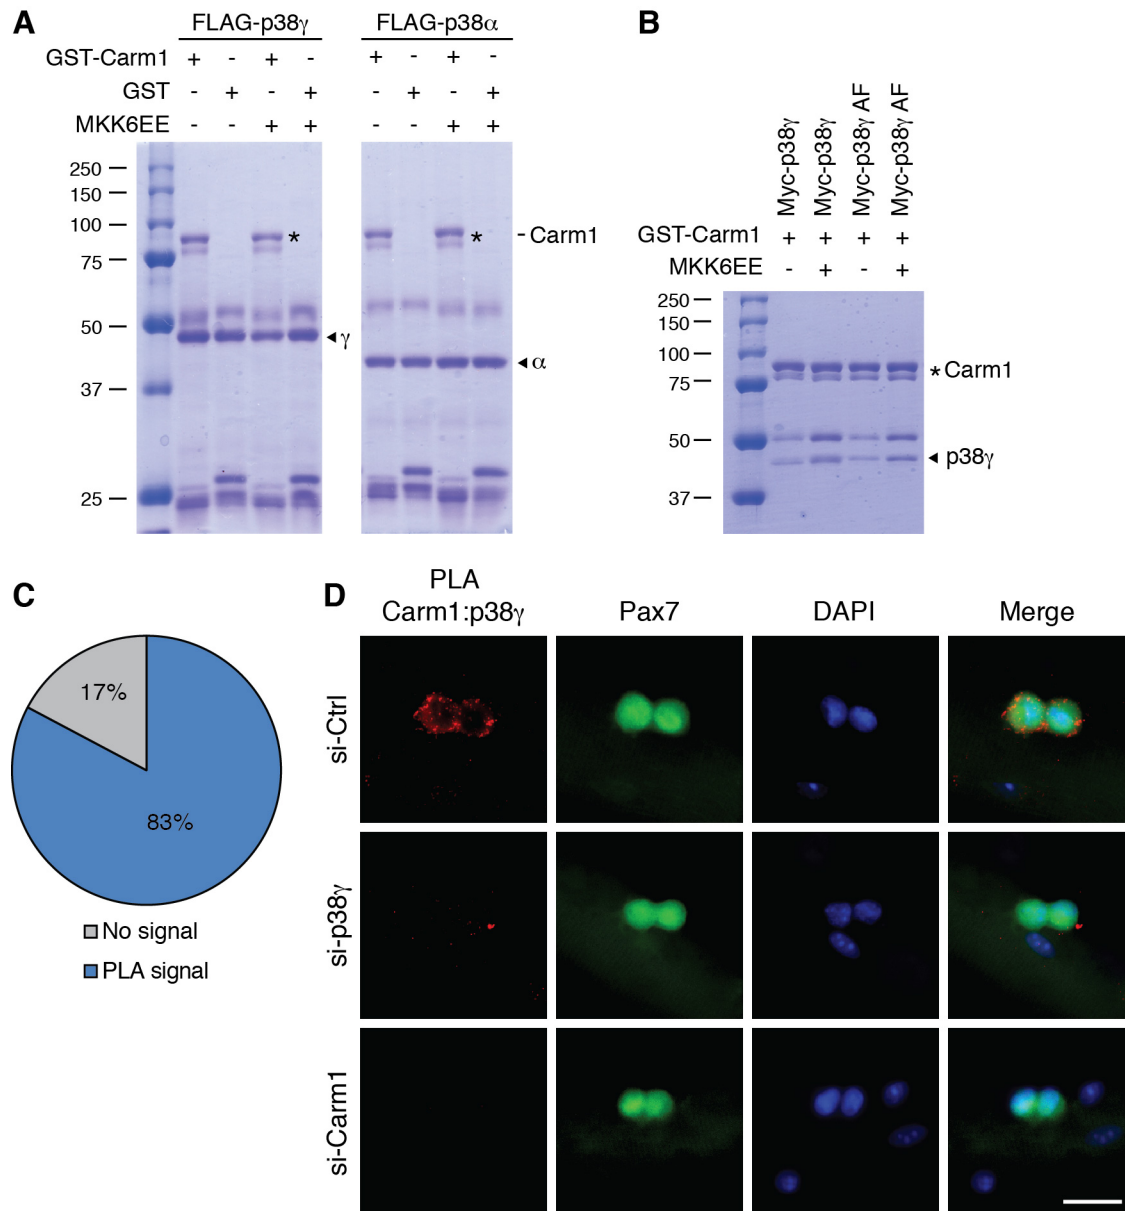

**Figure S1. Related to Figure 1. Carm1 is a Substrate for p38 $\gamma$**

(A) Coomassie blue stained protein gels corresponding to the *in vitro* kinase assay performed in Figure 1A. Asterisks denote GST-Carm1 protein and arrowheads denote FLAG-p38 $\gamma$  ( $\gamma$ ) and FLAG-p38 $\alpha$  ( $\alpha$ ) kinases.

(B) Coomassie blue stained protein gel corresponding to the *in vitro* kinase assay performed in Figure 1B. The asterisk denotes GST-Carm1 protein and arrowhead denotes Myc-p38 $\gamma$  kinase protein.

(C) Quantification of the percentage of activated satellite cells (after 42h of culture) that exhibited a Carm1:p38 $\gamma$  PLA signal.

(D) Carm1:p38 $\gamma$  PLA (red) performed on satellite cells cultured on isolated single myofibers treated with the indicated siRNAs. Satellite cells are marked by expression of Pax7 (green) and nuclei were counterstained with DAPI (blue). Scale bar represents 20  $\mu$ m.

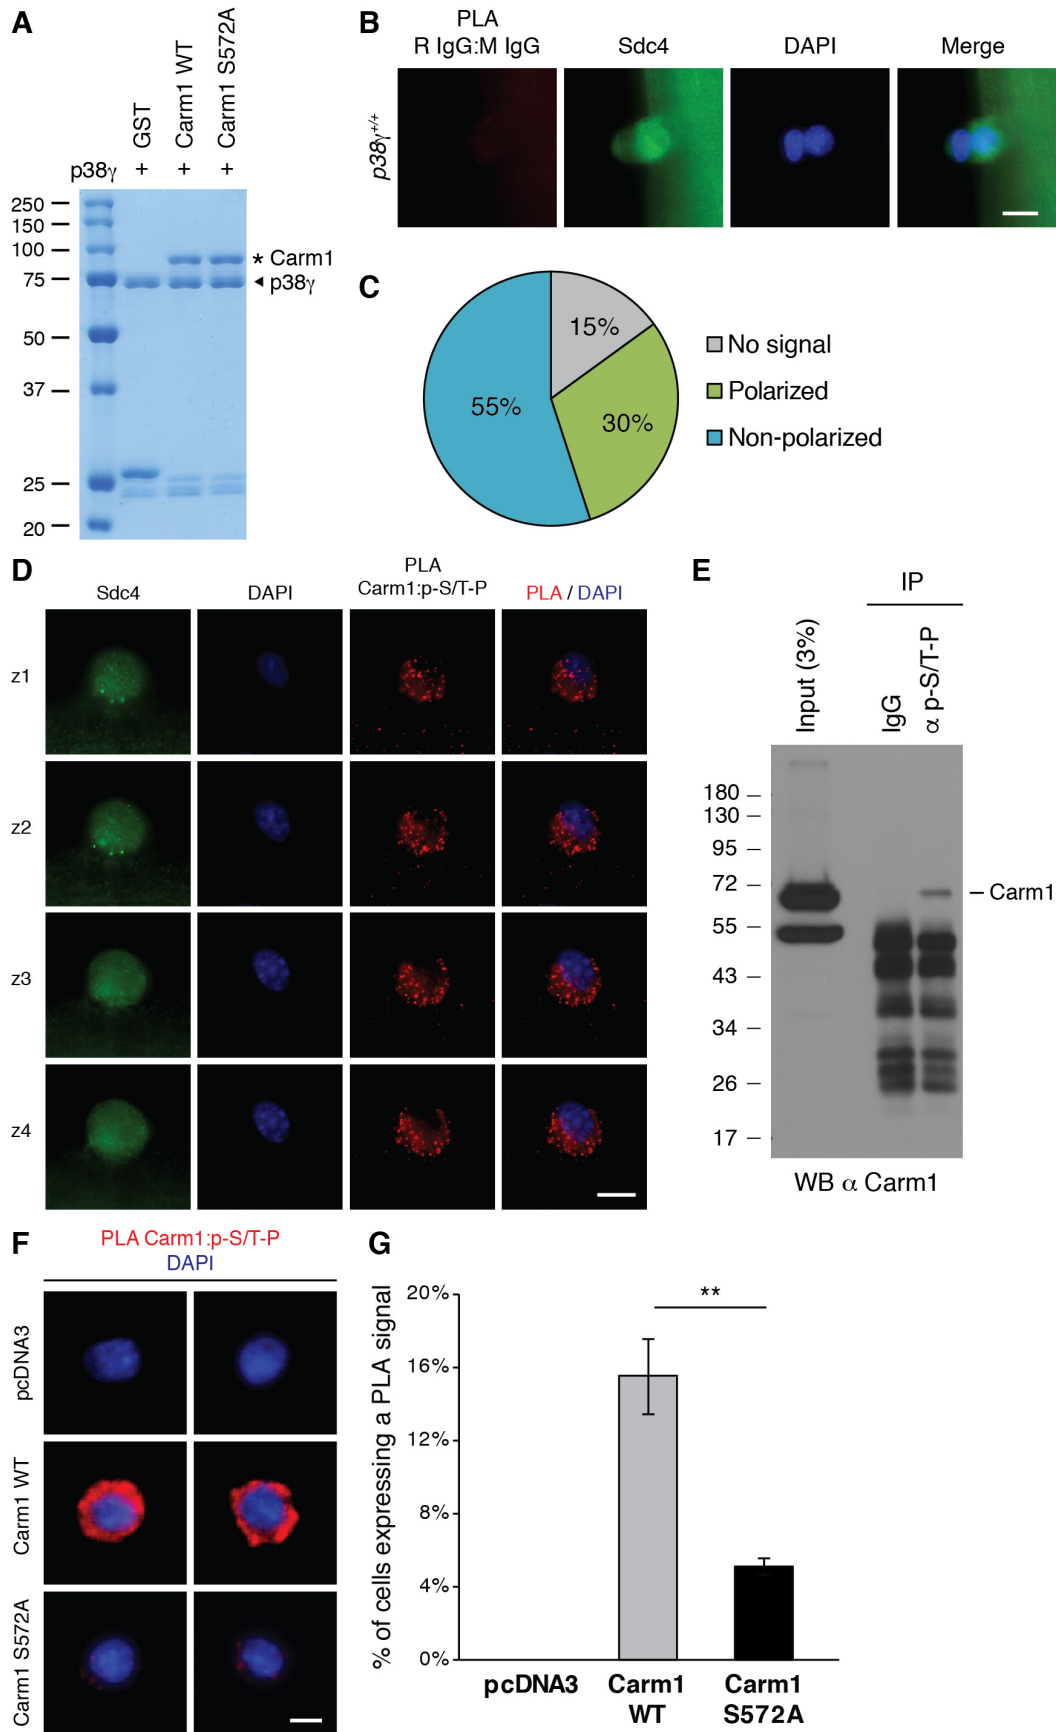

**Figure S2. Related to Figure 2. Carm1 is Phosphorylated on S572 by p38 $\gamma$**

(A) Coomassie blue stained protein gel corresponding to the *in vitro* kinase assay performed in Figure 2E. The asterisk denotes Carm1 protein and arrowhead denotes active p38 $\gamma$  kinase.

(B) Control PLA with rabbit and mouse IgG (red) performed on satellite cells cultured on single myofibers isolated from *p38 $\gamma$ <sup>+/+</sup>* mice. Satellite cells are marked by expression of Syndecan 4 (Sdc4, green) and nuclei were counterstained with DAPI (blue). Scale bar represents 10  $\mu$ m.

(C) Quantification of the percentage of activated satellite cells (cultured for 36h) exhibiting either no signal, or a polarized or non-polarized Carm1:p-S/T-P PLA signal.

(D) Z-stack images of a satellite cell expressing a Carm1:p-S/T-P PLA signal (red) and Sdc4 (green). The nucleus was counterstained with DAPI (blue). Images were acquired with a step size of 0.8  $\mu$ m. Scale bar represents 10  $\mu$ m.

(E) Immunoprecipitations (IP) with anti-p-S/T-P antibody or mouse IgG control were performed on cell lysates made from satellite cell-derived primary myoblasts. Immunoblot analysis was performed with anti-Carm1 antibody.

(F) *Carm1<sup>-/-</sup>* primary myoblasts were transiently transfected with either wild type Carm1, Carm1 S572A mutant, or pcDNA3 vector control. PLA (red) was performed with anti-Carm1 and anti-p-S/T-P antibodies and nuclei were counterstained with DAPI (blue). Scale bar represents 5  $\mu$ m.

(G) Quantification of the percentage of cells expressing a Carm1:p-S/T-P PLA signal in (F), represented as the mean (n = 5)  $\pm$  SEM (\*\*p  $\leq$  0.01).

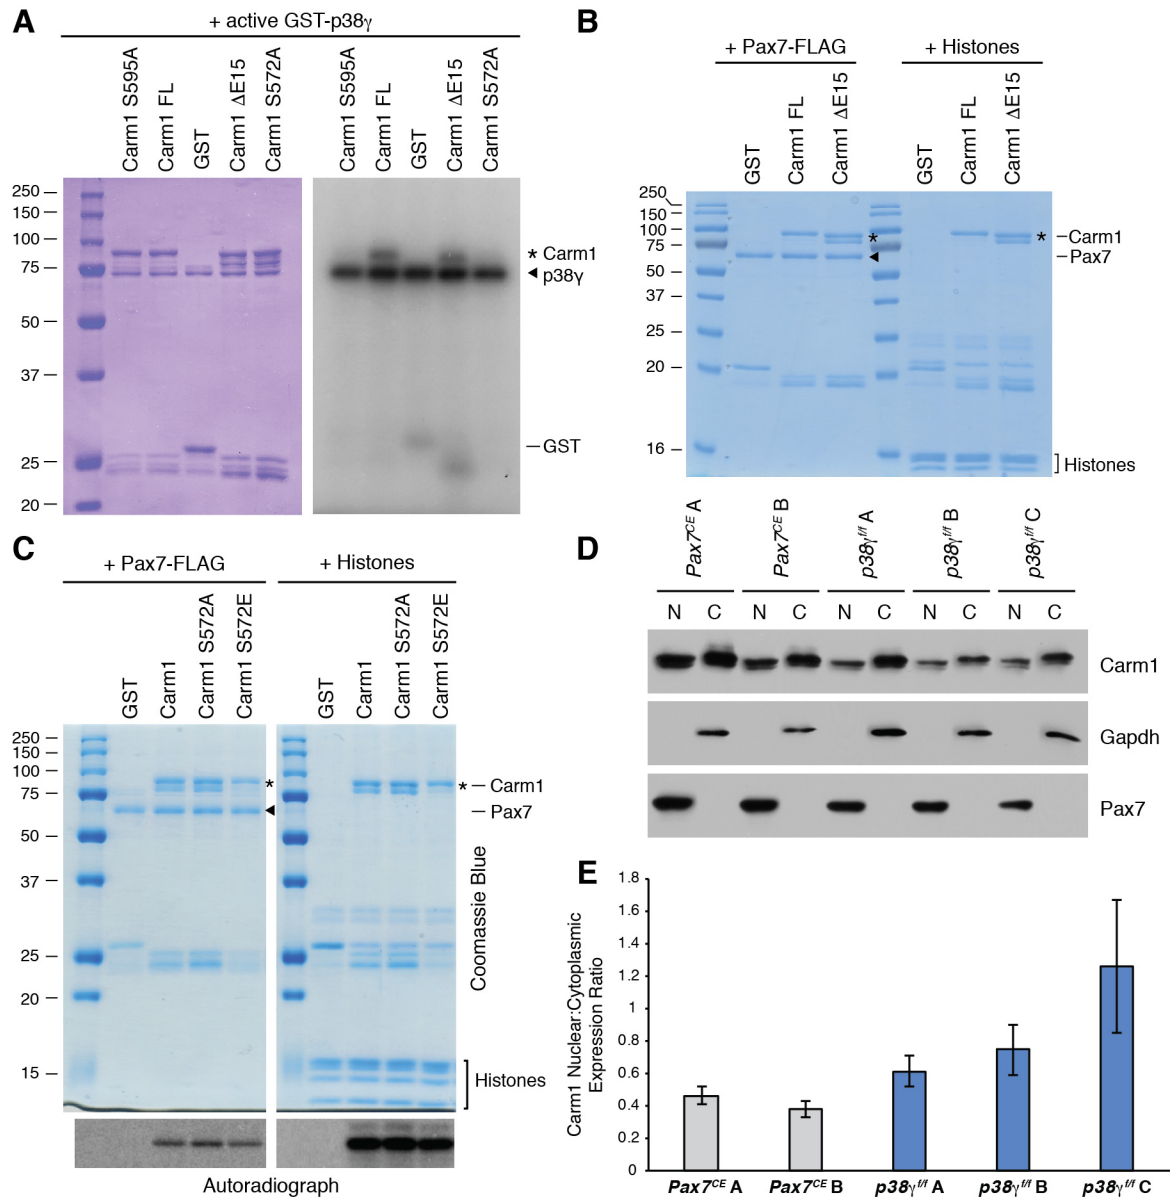

**Figure S3. Related to Figure 3. Carm1 Isoform 2 is Functionally Regulated by p38 $\gamma$**

(A) *In vitro* kinase assays between Carm1 FL (wild type and S595A mutant) or Carm1  $\Delta$ E15 (wild type and S572A mutant) with active p38 $\gamma$  kinase. The asterisk denotes Carm1 protein and arrowhead denotes active p38 $\gamma$  kinase.

(B) Coomassie blue stained protein gel corresponding to the *in vitro* methylation assay performed in Figure 3B. The asterisks denote Carm1 protein, and the arrowhead denotes Pax7 protein.

(C) *In vitro* methylation assays with wild type Carm1, Carm1 S572A and S572E mutants with either Pax7 or core histone proteins. The asterisks denote Carm1 protein and the arrowhead denotes Pax7 protein.

(D) Subcellular fractionation of satellite cell-derived primary myoblasts from  $Pax7^{CreER/+}$  ( $Pax7^{CE}$ ) and  $Pax7^{CreER/+};p38^{\Delta/fl}$  ( $p38^{\Delta/fl}$ ) mice. Immunoblot analysis was performed with the indicated antibodies.

(E) Densitometric quantification of Carm1 expression levels from (D), expressed as a ratio of nuclear to cytoplasmic expression. Carm1 expression was normalized to nucleus and cytoplasm loading controls (Pax7 and Gadph, respectively).

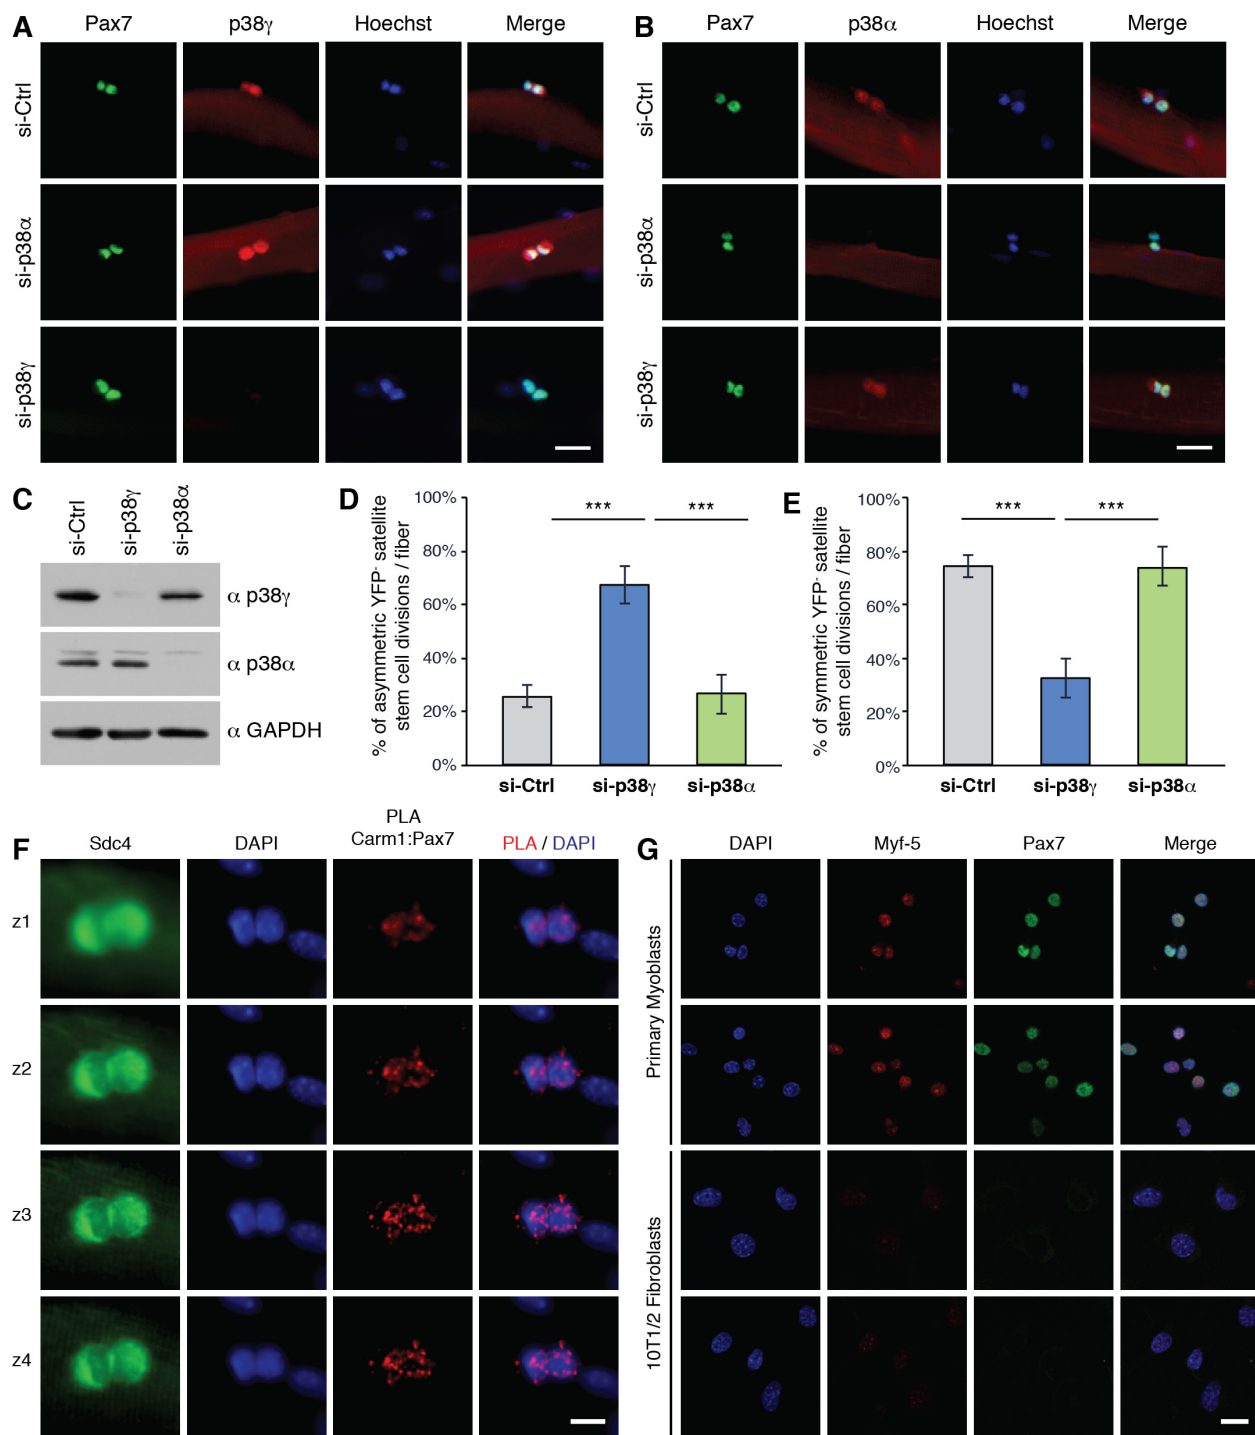

**Figure S4. Related to Figure 4. Validation of p38 $\gamma$  and p38 $\alpha$  siRNAs and Supplementary Analyses**

(A and B) Immunofluorescence staining with the indicated antibodies of satellite cells cultured for 42h on myofibers that were treated with the indicated siRNAs. Scale bar represents 20  $\mu$ m.



(C) Immunoblot analysis with the indicated antibodies of satellite cell-derived primary myoblasts treated with the indicated siRNAs.

(D) Quantification of the percentage of satellite stem cell (Pax7<sup>+</sup>/YFP<sup>-</sup>) divisions that are asymmetric, represented as the mean (n = 9) ± SEM (\*\*p ≤ 0.001).

(E) Quantification of the percentage of satellite stem cell (Pax7<sup>+</sup>/YFP<sup>-</sup>) divisions that are symmetric, represented as the mean (n = 9) ± SEM (\*\*p ≤ 0.001).

(F) Z-stack images of satellite cells expressing a Carm1:Pax7 PLA signal (red) and Sdc4 (green). Nuclei were counterstained with DAPI (blue). Images were acquired with a step size of 0.8 μm. Scale bar represents 10 μm.

(G) Validation of the anti-Myf5 antibody used in Figure 4D. Representative immunofluorescence images of primary myoblasts and 10T1/2 fibroblasts immunostained with Pax7 (green) and Myf5 (red). Nuclei were counterstained with DAPI (blue). Scale bar represents 20 μm.

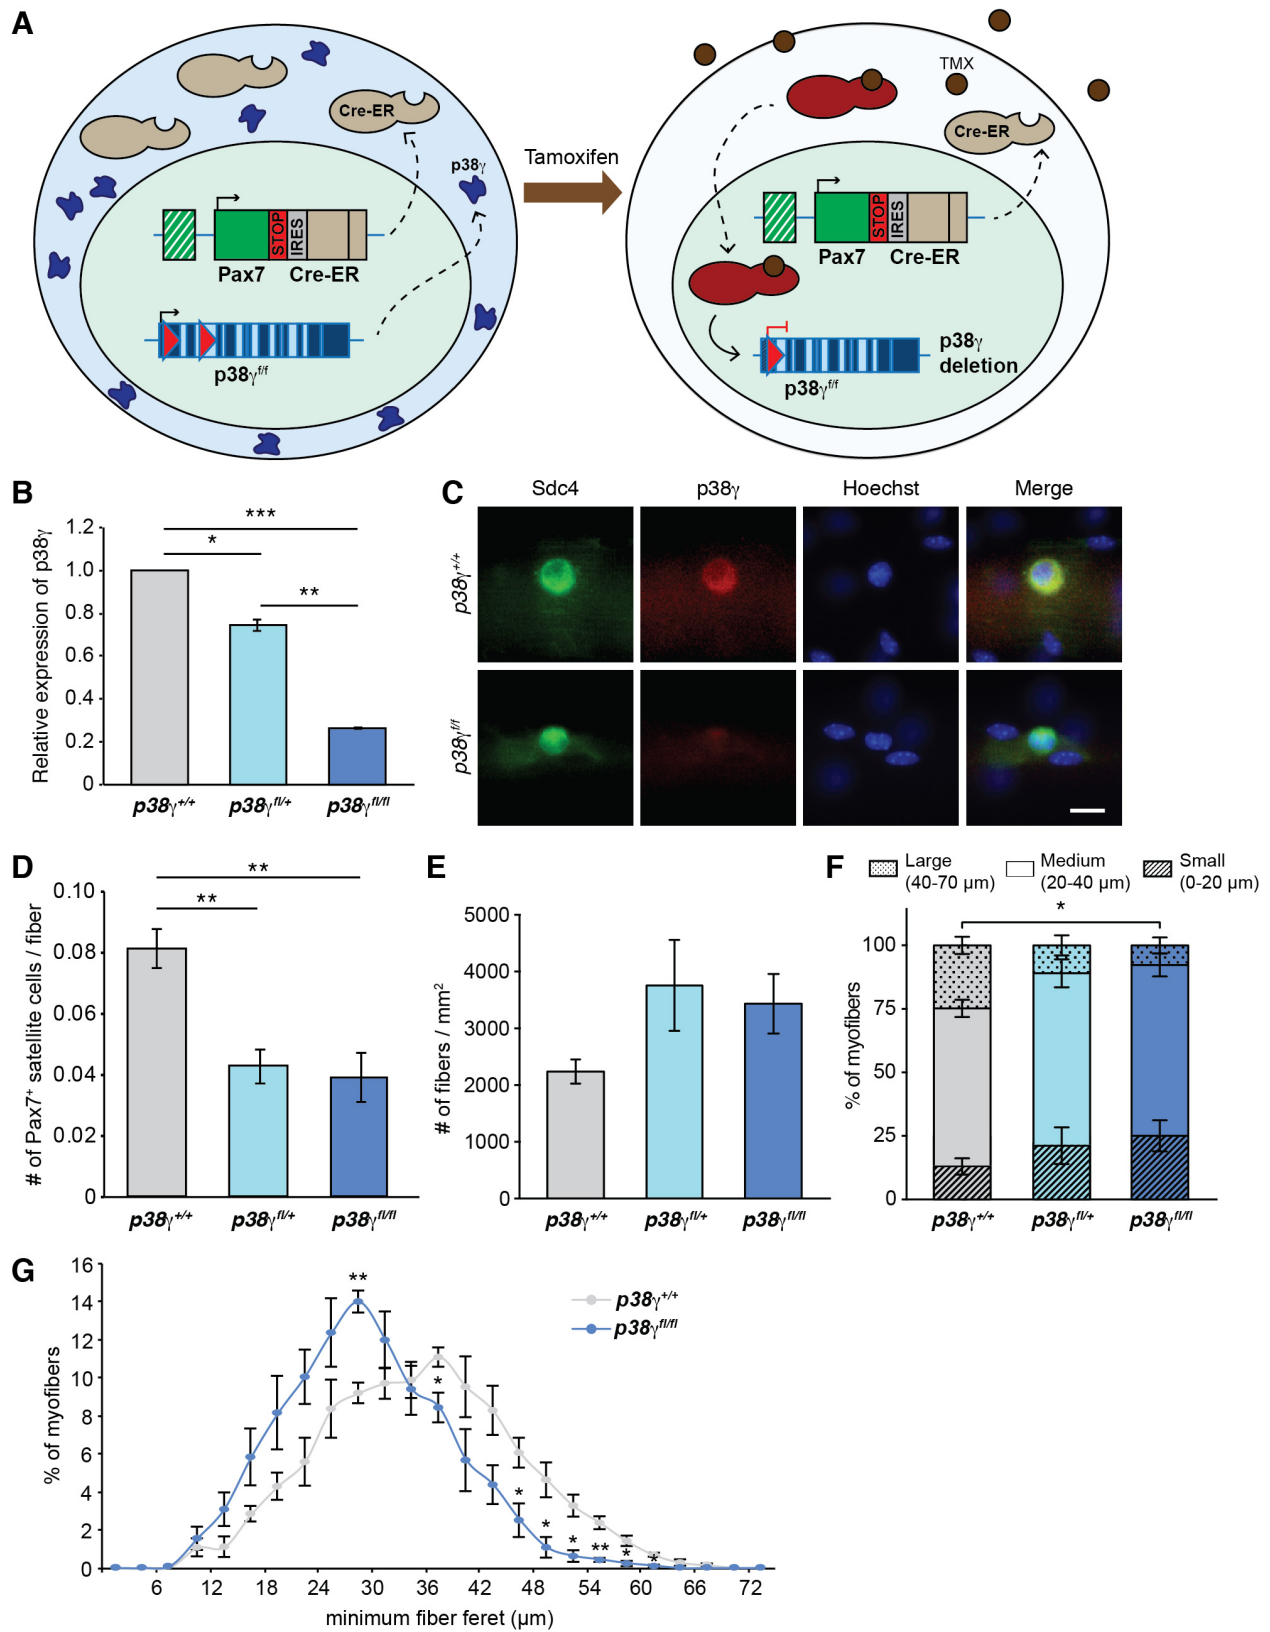

**Figure S5. Related to Figure 5. Description and Validation of the *Pax7<sup>CreER/+</sup>·p38<sup>γ<sup>fl/fl</sup></sup> Mouse Model***

(A) Schematic illustrating the satellite cell-specific genetic deletion of p38 $\gamma$  upon administration of tamoxifen (TMX). Following TMX administration, activated CreER-recombinase translocates to the nucleus to induce excision at the loxP sites (red arrowheads) within the *p38 $\gamma$*  gene resulting in genetic deletion of *p38 $\gamma$*  in *Pax7*-expressing cells.

(B) Relative expression of *p38 $\gamma$*  in prospectively isolated satellite cells from TMX-treated *p38 $\gamma^{+/+}$* , *p38 $\gamma^{fl/+}$*  and *p38 $\gamma^{fl/fl}$*  mice as determined by ddPCR. Data presented as the mean (n = 3)  $\pm$  SEM (\*p  $\leq$  0.05, \*\*p  $\leq$  0.01, \*\*\*p  $\leq$  0.001).

(C) Immunostaining with the indicated antibodies of myofibers isolated from TMX-treated *p38 $\gamma^{+/+}$*  and *p38 $\gamma^{fl/fl}$*  mice and cultured for 36h. Scale bar represents 10  $\mu$ m.

(D) Quantification of Pax7<sup>+</sup> satellite cells normalized to total fiber number from CTX-injured TA muscles isolated from mice described in Figure 5A, represented as the mean (n = 4 *p38 $\gamma^{+/+}$* , n = 3 *p38 $\gamma^{fl/+}$* , n = 3 *p38 $\gamma^{fl/fl}$* )  $\pm$  SEM (\*\*p  $\leq$  0.01).

(E) Quantification of the number of fibers normalized to TA cross-sectional area, represented as the mean (n = 4 *p38 $\gamma^{+/+}$* , n = 3 *p38 $\gamma^{fl/+}$* , n = 3 *p38 $\gamma^{fl/fl}$* )  $\pm$  SEM.

(F) Minimal fiber Feret was determined from 500 centrally-nucleated fibers per TA cross section, represented as the mean percentage of fibers that are small (0-20  $\mu$ m), medium (20-40  $\mu$ m) or large (40-70  $\mu$ m)  $\pm$  SEM (\*p  $\leq$  0.05).

(G) Fiber size distribution, as determined in (F) (\*p  $\leq$  0.05, \*\*p  $\leq$  0.01).

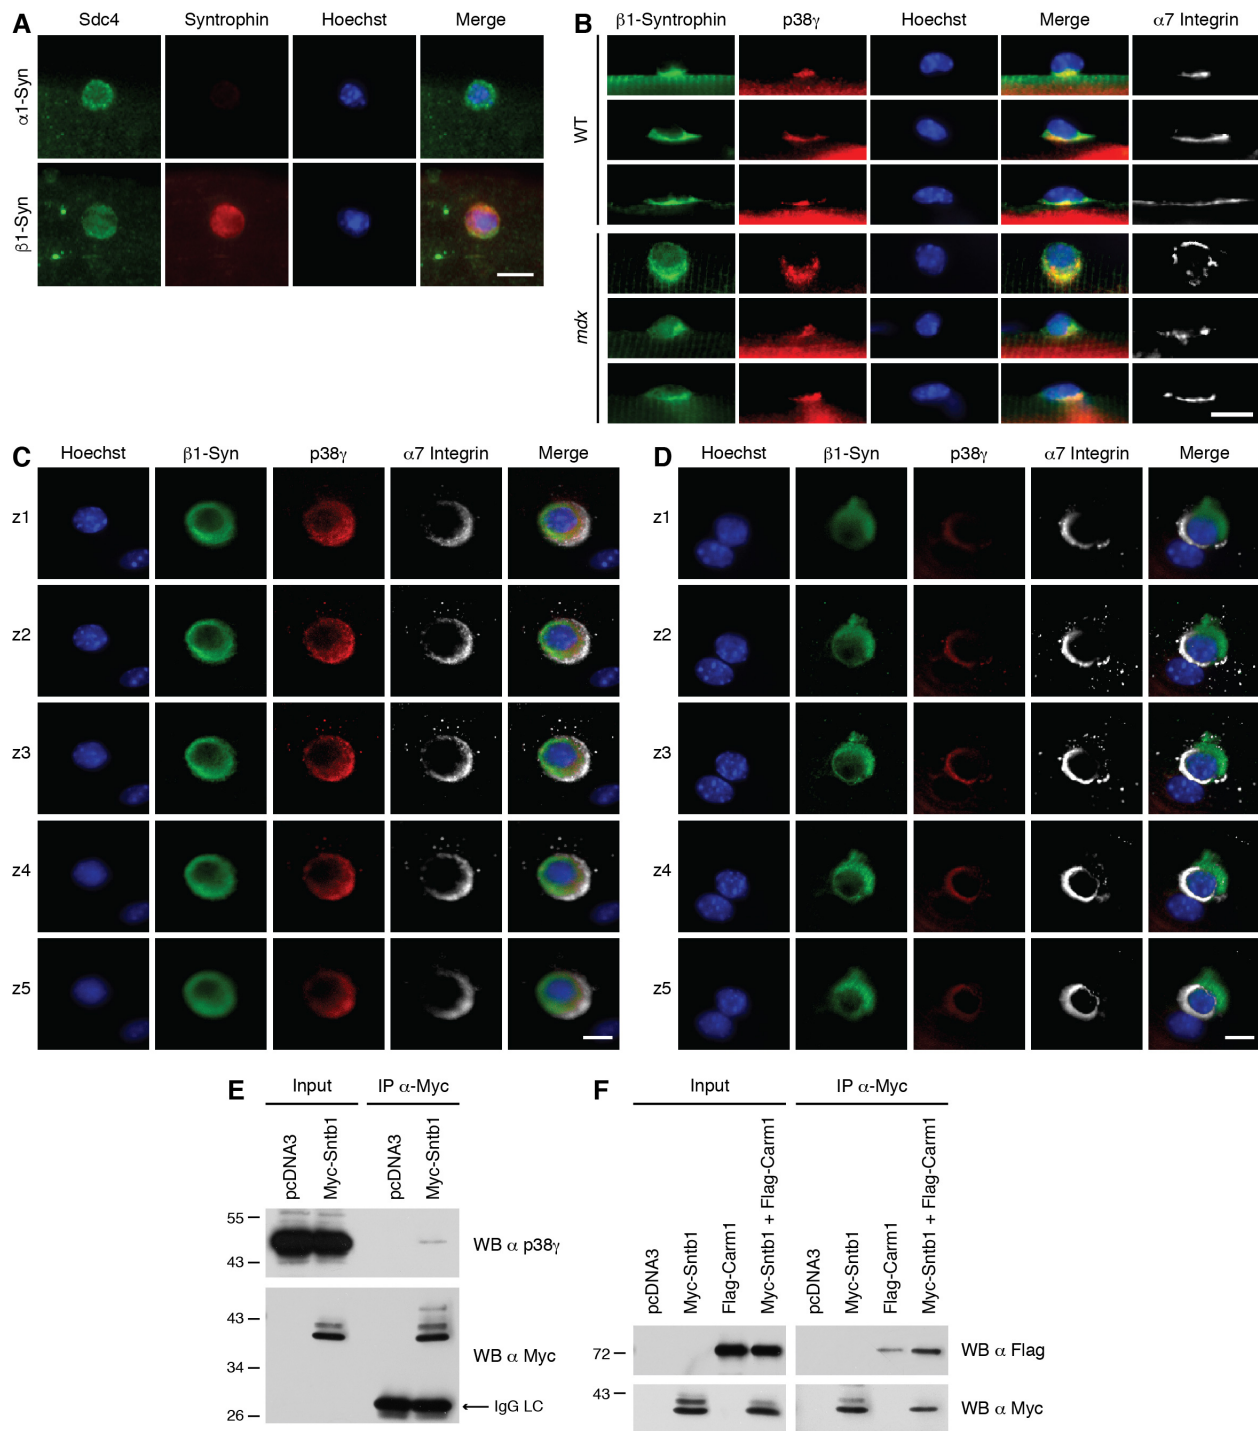

**Figure S6. Related to Figure 6. p38 $\gamma$ /Carm1 Interacts with  $\beta 1$ -Syntrophin in Satellite Cells**

(A) Immunofluorescence analysis of syntrophin isoform expression in satellite cells. Myofibers cultured for 36h were stained with antibodies against either  $\alpha 1$ -syntrophin or  $\beta 1$ -syntrophin

(red). Satellite cells are marked by Sdc4 expression (green) and nuclei were counterstained with Hoechst (blue). Scale bar represents 10  $\mu\text{m}$ .

(B) Immunofluorescence of satellite cells cultured for 36h on myofibers isolated from wild type (WT) or *mdx* mice. Cells were immunostained for  $\alpha 7$  integrin (white),  $\beta 1$ -syntrophin (green), and p38 $\gamma$  (red). Nuclei were counterstained with Hoechst (blue). Scale bar represents 10  $\mu\text{m}$ .

(C) Z-stack images of a wild type satellite cell expressing  $\beta 1$ -syntrophin (green), p38 $\gamma$  (red), and  $\alpha 7$  Integrin (white). Nuclei were counterstained with Hoechst (blue). Images were acquired with a step size of 0.4  $\mu\text{m}$ . Scale bar represents 10  $\mu\text{m}$ .

(D) Z-stack images of a dystrophin-deficient *mdx* satellite cell expressing  $\beta 1$ -syntrophin (green), p38 $\gamma$  (red), and  $\alpha 7$  Integrin (white). Nuclei were counterstained with Hoechst (blue). Images were acquired with a step size of 0.4  $\mu\text{m}$ . Scale bar represents 10  $\mu\text{m}$ .

(E) HEK 293T cells were transfected with Myc-tagged  $\beta 1$ -syntrophin (Myc-Sntb1).

Immunoprecipitation (IP) and immunoblotting were performed with the indicated antibodies.

(F) HEK 293T cells were transfected with Myc-tagged  $\beta 1$ -syntrophin (Myc-Sntb1) and Flag-tagged Carm1 (Flag-Carm1). Immunoprecipitation (IP) and immunoblotting were performed with the indicated antibodies.

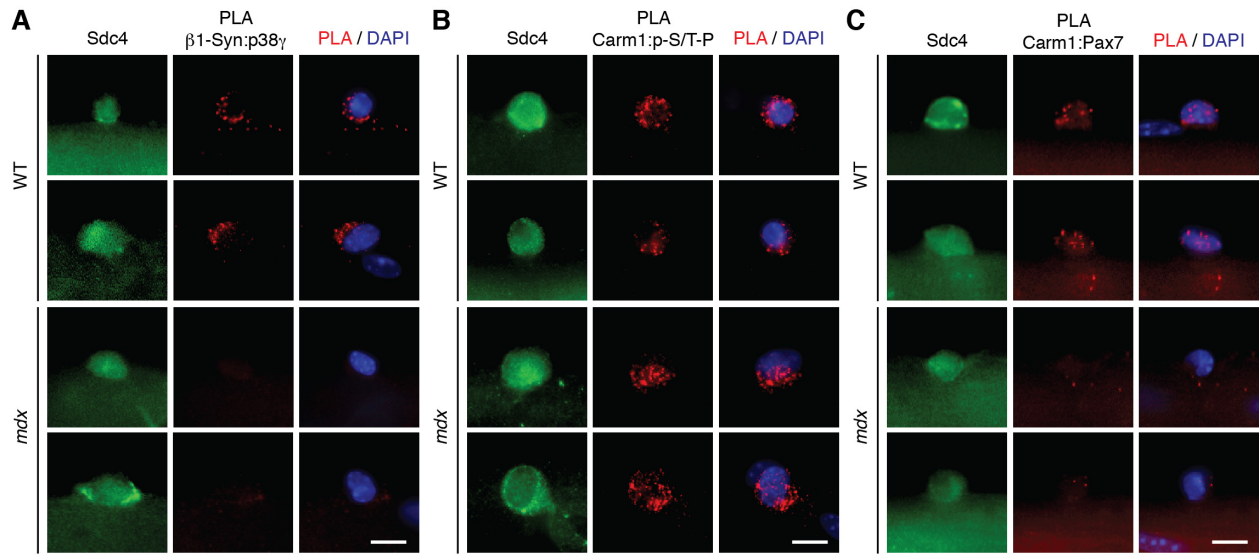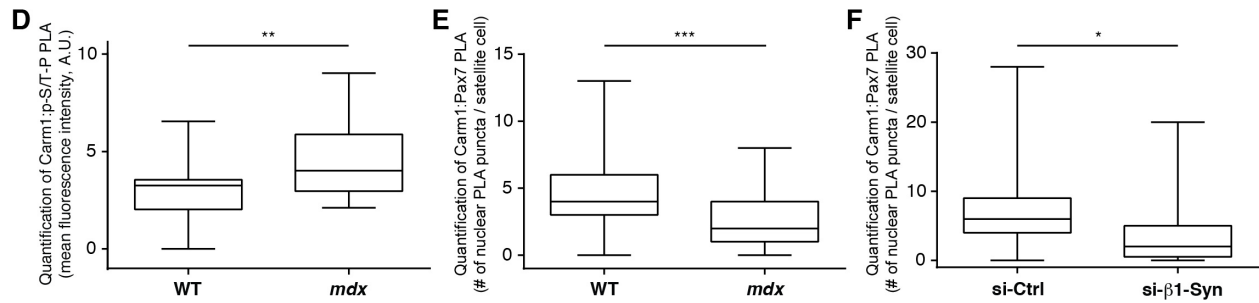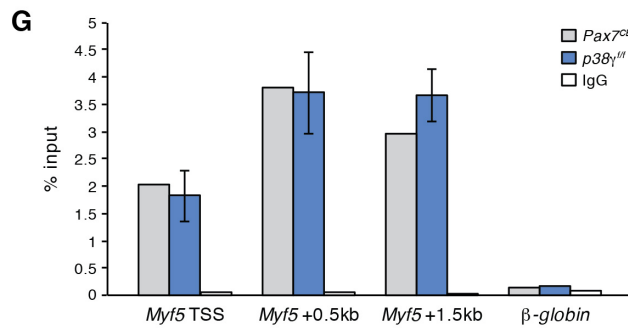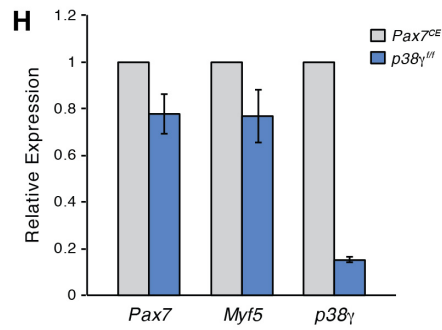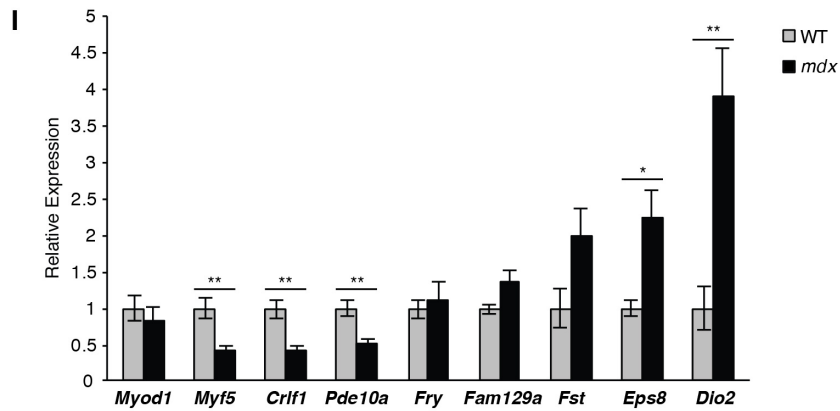

**Figure S7. Related to Figures 6 and 7. p38 $\gamma$ -Mediated Carm1 Regulation is Perturbed in *mdx* Satellite Cells**

(A, B, and C) Additional examples of PLA (red) with indicated antibodies performed on 36h cultured myofibers isolated from wild type (WT) and *mdx* mice. Satellite cells are marked by Sdc4 expression (green) and nuclei were counterstained with DAPI (blue). Scale bar represents 10  $\mu$ m.

(D) Box and whiskers plot representation of the quantification of Carm1:p-S/T-P PLA in Figure 6G, represented as the relative mean (n = 21 WT, n = 26 *mdx*)  $\pm$  SEM (\*\*p  $\leq$  0.01). The PLA was quantified by determining mean fluorescence intensity of the PLA signal of each satellite cell (A.U., arbitrary units).

(E) Box and whiskers plot representation of the quantification Carm1:Pax7 PLA in Figure 7B, represented as the relative mean (n = 81 WT, n = 137 *mdx*)  $\pm$  SEM (\*\*p  $\leq$  0.001). The PLA was quantified by counting the number of nuclear PLA puncta of each satellite cell.

(F) Box and whiskers plot representation of the quantification of Carm1:Pax7 PLA in Figure 7D, represented as the relative mean (n = 53 si-Ctrl, n = 73 si- $\beta$ 1-Syn)  $\pm$  SEM (\*p  $\leq$  0.05). The PLA was quantified by counting the number of nuclear PLA puncta of each satellite cell.

(G) qPCR analyses of indicated genes in freshly sorted satellite cells from *Pax7<sup>CreER/+</sup>* (*Pax7<sup>CE</sup>*) and *Pax7<sup>CreER/+</sup>:p38<sup>fl/fl</sup>* (*p38<sup>fl/fl</sup>*) mice 3 days post injury with cardiotoxin, represented as the mean (n = 1 *Pax7<sup>CE</sup>*, n = 4 *p38<sup>fl/fl</sup>*)  $\pm$  SEM.

(H) ChIP-qPCR analysis of H3K4me3 at *Myf5* in *Pax7<sup>CE</sup>* and *p38<sup>fl/fl</sup>* primary myoblasts represented as the mean (n = 2 *Pax7<sup>CE</sup>*, n = 3 *p38<sup>fl/fl</sup>*)  $\pm$  SEM.

(I) qPCR gene expression analysis of indicated Pax7 target genes in freshly sorted satellite cells from WT and *mdx* mice represented as the mean (n = 6 WT, n = 7 *mdx*)  $\pm$  SEM (\*p  $\leq$  0.05, \*\*p  $\leq$  0.01).



**SUPPLEMENTAL TABLES**

| #  | b                | b <sup>++</sup>  | b <sup>*</sup>   | b <sup>***</sup> | b <sup>0</sup>   | b <sup>0++</sup> | Seq. | y                | y <sup>++</sup>  | y <sup>*</sup>   | y <sup>***</sup> | y <sup>0</sup>   | y <sup>0++</sup> | #  |
|----|------------------|------------------|------------------|------------------|------------------|------------------|------|------------------|------------------|------------------|------------------|------------------|------------------|----|
| 1  | 72.0444          | 36.5258          |                  |                  |                  |                  | A    |                  |                  |                  |                  |                  |                  | 30 |
| 2  | 171.1128         | 86.06            |                  |                  |                  |                  | V    | 3185.3084        | 1593.1578        | 3168.2818        | 1584.6446        | 3167.2978        | 1584.1525        | 29 |
| 3  | 285.1557         | 143.0815         | 268.1292         | 134.5682         |                  |                  | N    | 3086.24          | 1543.6236        | 3069.2134        | 1535.1104        | 3068.2294        | 1534.6183        | 28 |
| 4  | 399.1987         | 200.103          | 382.1721         | 191.5897         |                  |                  | N    | 2972.197         | <b>1486.6022</b> | 2955.1705        | 1478.0889        | 2954.1865        | 1477.5969        | 27 |
| 5  | <b>527.2572</b>  | 264.1323         | 510.2307         | 255.619          |                  |                  | Q    | 2858.1541        | 1429.5807        | 2841.1276        | 1421.0674        | 2840.1436        | 1420.5754        | 26 |
| 6  | <b>674.3257</b>  | 337.6665         | <b>657.2991</b>  | 329.1532         |                  |                  | F    | 2730.0955        | <b>1365.5514</b> | 2713.069         | <b>1357.0381</b> | 2712.085         | <b>1356.5461</b> | 25 |
| 7  | 775.3733         | 388.1903         | 758.3468         | 379.677          | 757.3628         | 379.185          | T    | 2583.0271        | <b>1292.0172</b> | 2566.0006        | <b>1283.5039</b> | 2565.0166        | <b>1283.0119</b> | 24 |
| 8  | 922.4087         | 461.708          | <b>905.3822</b>  | 453.1947         | 904.3982         | 452.7027         | M    | 2481.9794        | <b>1241.4934</b> | 2464.9529        | <b>1232.9801</b> | 2463.9689        | 1232.4881        | 23 |
| 9  | 979.4302         | <b>490.2187</b>  | 962.4036         | 481.7055         | <b>961.4196</b>  | 481.2135         | G    | 2334.944         | <b>1167.9757</b> | 2317.9175        | <b>1159.4624</b> | 2316.9335        | 1158.9704        | 22 |
| 10 | 1036.4517        | 518.7295         | 1019.4251        | 510.2162         | 1018.4411        | <b>509.7242</b>  | G    | 2277.9226        | <b>1139.4649</b> | 2260.896         | 1130.9517        | 2259.912         | 1130.4596        | 21 |
| 11 | 1133.5044        | <b>567.2558</b>  | 1116.4779        | 558.7426         | 1115.4939        | 558.2506         | P    | 2220.9011        | 1110.9542        | 2203.8746        | 1102.4409        | 2202.8906        | 1101.9489        | 20 |
| 12 | <b>1204.5415</b> | <b>602.7744</b>  | 1187.515         | 594.2611         | 1186.531         | 593.7691         | A    | 2123.8484        | 1062.4278        | 2106.8218        | <b>1053.9145</b> | 2105.8378        | <b>1053.4225</b> | 19 |
| 13 | <b>1317.6256</b> | 659.3164         | <b>1300.5991</b> | 650.8032         | <b>1299.615</b>  | 650.3112         | I    | 2052.8112        | <b>1026.9093</b> | 2035.7847        | 1018.396         | 2034.8007        | 1017.904         | 18 |
| 14 | <b>1404.6576</b> | 702.8325         | 1387.6311        | 694.3192         | <b>1386.6471</b> | 693.8272         | S    | <b>1939.7272</b> | <b>970.3672</b>  | 1922.7006        | <b>961.854</b>   | 1921.7166        | <b>961.3619</b>  | 17 |
| 15 | <b>1551.693</b>  | 776.3502         | 1534.6665        | 767.8369         | 1533.6825        | 767.3449         | M    | 1852.6952        | 926.8512         | 1835.6686        | 918.3379         | 1834.6846        | 917.8459         | 16 |
| 16 | <b>1622.7301</b> | 811.8687         | <b>1605.7036</b> | <b>803.3554</b>  | 1604.7196        | <b>802.8634</b>  | A    | 1705.6598        | <b>853.3335</b>  | 1688.6332        | 844.8202         | 1687.6492        | 844.3282         | 15 |
| 17 | 1789.7285        | 895.3679         | 1772.702         | <b>886.8546</b>  | 1771.7179        | <b>886.3626</b>  | S    | 1634.6226        | <b>817.815</b>   | <b>1617.5961</b> | <b>809.3017</b>  | 1616.6121        | <b>808.8097</b>  | 14 |
| 18 | 1886.7813        | 943.8943         | 1869.7547        | 935.381          | 1868.7707        | 934.889          | P    | 1467.6243        | <b>734.3158</b>  | 1450.5977        | 725.8025         | 1449.6137        | 725.3105         | 13 |
| 19 | 2033.8167        | 1017.412         | 2016.7901        | <b>1008.8987</b> | 2015.8061        | <b>1008.4067</b> | M    | 1370.5715        | <b>685.7894</b>  | 1353.545         | 677.2761         | 1352.561         | 676.7841         | 12 |
| 20 | 2120.8487        | 1060.928         | 2103.8221        | 1052.4147        | 2102.8381        | 1051.9227        | S    | <b>1223.5361</b> | <b>612.2717</b>  | 1206.5096        | 603.7584         | 1205.5256        | <b>603.2664</b>  | 11 |
| 21 | 2233.9328        | <b>1117.47</b>   | 2216.9062        | <b>1108.9567</b> | 2215.9222        | <b>1108.4647</b> | I    | <b>1136.5041</b> | <b>568.7557</b>  | <b>1119.4775</b> | 560.2424         | <b>1118.4935</b> | 559.7504         | 10 |
| 22 | 2330.9855        | 1165.9964        | 2313.959         | 1157.4831        | 2312.975         | 1156.9911        | P    | <b>1023.42</b>   | <b>512.2136</b>  | <b>1006.3935</b> | 503.7004         | <b>1005.4095</b> | 503.2084         | 9  |
| 23 | 2432.0332        | 1216.5202        | 2415.0066        | 1208.007         | 2414.0226        | 1207.515         | T    | 926.3673         | <b>463.6873</b>  | 909.3407         | 455.174          | 908.3567         | 454.682          | 8  |
| 24 | 2546.0761        | 1273.5417        | 2529.0496        | 1265.0284        | 2528.0656        | <b>1264.5364</b> | N    | <b>825.3196</b>  | <b>413.1634</b>  | 808.293          | 404.6502         | 807.309          | 404.1581         | 7  |
| 25 | 2647.1238        | <b>1324.0655</b> | 2630.0973        | 1315.5523        | 2629.1132        | 1315.0603        | T    | <b>711.2767</b>  | 356.142          |                  |                  | 693.2661         | 347.1367         | 6  |
| 26 | 2794.1592        | <b>1397.5832</b> | 2777.1327        | 1389.07          | 2776.1486        | 1388.578         | M    | 610.229          | 305.6181         |                  |                  | 592.2184         | 296.6128         | 5  |
| 27 | 2931.2181        | 1466.1127        | 2914.1916        | 1457.5994        | 2913.2076        | 1457.1074        | H    | <b>463.1936</b>  | 232.1004         |                  |                  | 445.183          | 223.0951         | 4  |
| 28 | 3094.2814        | 1547.6444        | 3077.2549        | 1539.1311        | 3076.2709        | 1538.6391        | Y    | 326.1347         | 163.571          |                  |                  | 308.1241         | 154.5657         | 3  |
| 29 | 3151.3029        | 1576.1551        | 3134.2764        | 1567.6418        | 3133.2923        | 1567.1498        | G    | 163.0713         | 82.0393          |                  |                  | 145.0608         | 73.034           | 2  |
| 30 |                  |                  |                  |                  |                  |                  | S    | 106.0499         | 53.5286          |                  |                  | 88.0393          | 44.5233          | 1  |

**Table S1. Related to Figure 2. Fragment Mass Match Table**

All predicted MS2 peaks for the indicated peptide sequence as described in Figure 2B (including the indicated oxidations and phosphorylation). Observed peaks are highlighted in red.

| Score | Mr(calc)  | Delta   | Sequence                       | Site Analysis      |
|-------|-----------|---------|--------------------------------|--------------------|
| 64.5  | 3255.3382 | 0.0043  | AVNNQFTMGGPAISMASPMSIPTNTMHYGS | Phospho S17 95.87% |
| 48.8  | 3255.3382 | 0.0043  | AVNNQFTMGGPAISMASPMSIPTNTMHYGS | Phospho S20 2.61%  |
| 46.3  | 3255.3382 | 0.0043  | AVNNQFTMGGPAISMASPMSIPTNTMHYGS | Phospho S14 1.48%  |
| 29.2  | 3255.3382 | 0.0043  | AVNNQFTMGGPAISMASPMSIPTNTMHYGS | Phospho T23 0.03%  |
| 20.9  | 3255.3382 | 0.0043  | AVNNQFTMGGPAISMASPMSIPTNTMHYGS | Phospho S30 0.00%  |
| 19.6  | 3255.3382 | 0.0043  | AVNNQFTMGGPAISMASPMSIPTNTMHYGS |                    |
| 17.1  | 3255.3382 | 0.0043  | AVNNQFTMGGPAISMASPMSIPTNTMHYGS | Phospho T25 0.00%  |
| 11.9  | 3255.3382 | 0.0043  | AVNNQFTMGGPAISMASPMSIPTNTMHYGS | Phospho T7 0.00%   |
| 11.3  | 3255.357  | -0.0145 | GPSSPAHSGALDLGVSRRHQNAMGREKEL  |                    |
| 7.4   | 3255.3389 | 0.0036  | NLKGQVLSTINTNQMNNSHAVISPCSRF   |                    |

**Table S2. Related to Figure 2. All Matches Table**

Determination of the Carm1 phosphorylation site as shown in Figure 2B. All peptides in the reference proteome matching the mass of the parent ion are listed, along with the corresponding Mascot Score (and phosphorylation site localization probabilities, where applicable) for each possible interpretation.

| <b>siRNA Targeting Sequences (Figures 3, 4, 7)</b>                   |                                                                                          |
|----------------------------------------------------------------------|------------------------------------------------------------------------------------------|
| <i>Mapk12</i> (p38 $\gamma$ )<br>Dharmacon (Cat# L-062913-00)        | AAUGGAAGCGUGUGACUUA<br>CGACUCCUUUGAUGAUGUA                                               |
| <i>Mapk14</i> (p38 $\alpha$ )<br>Dharmacon (Cat# L-040125-00)        | GGGAGGUGCCCGAACGAUA<br>GCAAGAAACUACAUUCAGU<br>ACAUUCGGCUGACAUAUU<br>GAAAUGGAGUCCUGAGCAC  |
| <i>Carm1</i><br>Dharmacon (Cat# L-048766-00)                         | GCUACAUGCUCUCAAUGA<br>GGAAGCACCUAUAAUCUCA                                                |
| <i>Sntb1</i> ( $\beta$ 1-Syn)<br>Dharmacon (Cat# L-049361-00)        | GGCAUAAAGUUCUGGUGAA<br>CCACUGGACAAGAAGCAUA<br>GAAUCAGGAUGCUCUAUUU<br>GAAUGCCGCUUGACCAUAC |
| ON-TARGETplus Non-targeting siRNA #1<br>Dharmacon (Cat# D-001810-01) | UGGUUUACAUGUCGACUAA                                                                      |

**Table S3. Related to STAR Methods. siRNA Targeting Sequences**

| <b>For ChIP (Figure 7)</b>             |                                                |
|----------------------------------------|------------------------------------------------|
| <i>Myf5</i> TSS Fwd                    | TAATAACGCCAGCTACAGG                            |
| <i>Myf5</i> TSS Rev                    | TTCAGCAGAGAGGGAGACAC                           |
| <i>Myf5</i> +0.5kb Fwd                 | CAAAGCTTGCAAGAGGAA                             |
| <i>Myf5</i> +0.5kb Rev                 | CTGGAGGCTCTCAATGTAGC                           |
| <i>Myf5</i> +0.7kb Fwd                 | GAGGGAACAGGTGGAGAACT                           |
| <i>Myf5</i> +0.7kb Rev                 | CAATGGTCCCCTGGTTTAG                            |
| <i>Myf5</i> +1.5 kb Fwd                | ACAGCAGCTTTGACAGCATC                           |
| <i>Myf5</i> +1.5 kb Rev                | GGACAGACTGCCATGACTGA                           |
| $\beta$ -globin ( <i>Hbb</i> ) TSS Fwd | CAGGGAGAAATATGCTTGTCATCA                       |
| $\beta$ -globin ( <i>Hbb</i> ) TSS Rev | GTGAGCAGATTGGCCCTTACC                          |
| <b>For RT-qPCR (Figure 7 and S7)</b>   |                                                |
| <i>Myf5</i> Fwd                        | TGACGGCATGCCTGAATGTA                           |
| <i>Myf5</i> Rev                        | ATCTGCAGCACATGCATTTGATA                        |
| <i>Rps18</i> Fwd                       | AACGGTCTAGACAACAAGCTG                          |
| <i>Rps18</i> Rev                       | AGTGGTCTTGGTGTGCTGAC                           |
| <i>Pax7</i> Fwd                        | GACGACGAGGAAGGAGACAA                           |
| <i>Pax7</i> Rev                        | ACATCTGAGCCCTCATCCAG                           |
| <i>Myod1</i> Fwd                       | TGATGGCATGATGGATTACAG                          |
| <i>Myod1</i> Rev                       | GTAGTAGGCGGTGTCGTA                             |
| <i>MyoG</i> Fwd                        | CAGTGAATGCAACTCCCACAG                          |
| <i>MyoG</i> Rev                        | ATGGACGTAAGGGAGTGCAGA                          |
| <i>Mapk12</i> Fwd                      | TGGGCTACTGGATGTGTTCA                           |
| <i>Mapk12</i> Rev                      | CTTCAGCCCCTTCAACATCT                           |
| <i>Carm1</i> Fwd                       | TCCTCATCCAGTTTGCCACAC                          |
| <i>Carm1</i> Rev                       | ATTCCTCTGTCCGCTCACTGA                          |
| <i>Crlf1</i> Fwd                       | GCAGAAGTCACACAAGAC                             |
| <i>Crlf1</i> Rev                       | GGATGGCCTATCCTTAGAG                            |
| <i>Pde10a</i> Fwd                      | CCTGCTATAACCACCTGA                             |
| <i>Pde10a</i> Rev                      | CCTTCTCCCCTGATTGA                              |
| <i>Fry</i> Fwd                         | GAGTGCCTGAAGAACAATGA                           |
| <i>Fry</i> Rev                         | AGAGTCTGGTGACGGAAATA                           |
| <i>Fam129a</i> Fwd                     | GGCCATCGAGAAGGTTAAG                            |
| <i>Fam129a</i> Rev                     | AGTGGGCAGTGTGATTTG                             |
| <i>Fst</i> Fwd                         | CAGTGACAATGCCACATAC                            |
| <i>Fst</i> Rev                         | CCTCTTCCCTCCGTTTCTT                            |
| <i>Eps8</i> Fwd                        | GAACGGAGCACAACTCTTT                            |
| <i>Eps8</i> Rev                        | ACTCGGAGCTTCCACTACT                            |
| <i>Dio2</i> Fwd                        | ACTCGGTCATTCTGCTCAAG                           |
| <i>Dio2</i> Rev                        | GATTCAGGATTGGAGACGTG                           |
| <b>For ddPCR (Figures S5)</b>          |                                                |
| <i>Mapk12</i> Fwd                      | AGAACGTCATTGGGCTACTG                           |
| <i>Mapk12</i> Rev                      | CTGGATTCTGTCTTCACTCAGG                         |
| <i>Mapk12</i> Probe                    | 56-FAM/CACAGACTT/ZEN/CTACCTGGTGATGCCAT/3IABkFQ |
| <i>Tbp</i> Fwd                         | CGTGAATCTTGGCTGTAACTTG                         |
| <i>Tbp</i> Rev                         | GTCCGTGGCTCTCTTATTCTC                          |
| <i>Tbp</i> Probe                       | 5HEX/ATCCCAAGC/ZEN/GATTTGCTGCAGTC/3IABkFQ      |

**Table S4. Related to STAR Methods. Primers Used for ChIP, RT-qPCR, and ddPCR Analyses**

Fwd, Forward primer; Rev, Reverse primer
